# Supplementary material for: Comparison of Integrated Outpatient Palliative Care With Standard Care in Patients With Parkinson Disease and Related Disorders: A Randomized Clinical Trial
Source: PubMed Central journal article supplement (PMC7042842; doi:10.1001/jamaneurol.2019.4992), 2020-02-10
Supplement: jamaneurol-77-551-s002.pdf [file jamaneurol-77-551-s002.pdf]

## Supplementary Online Content

Kluger BM, Miyasaki J, Katz M, et al. Comparison of integrated outpatient palliative care with standard care in patients with Parkinson disease and related disorders: a randomized clinical trial. *JAMA Neurol*. Published February 10, 2020. doi:10.1001/jamaneurol.2019.4992

**eMethods 1.** Palliative Care Needs Assessment Tool—Parkinson Disease

**eMethods 2.** Detailed Description of Outpatient Palliative Care Intervention: Training and Experience of the Integrated Palliative Care Team, Logistics of Integrated Palliative Care Clinic Visits, and Goals of Integrated Palliative Care Visits and Team Member Roles

**eMethods 3.** Neurologist, Social Worker, Spiritual Care, and Nurse Visit Checklists

**eMethods 4.** Patient Health Care Utilization and Caregiver Health Care Utilization Questionnaires

**eResults.** Additional Sensitivity Analyses, Subgroup Analyses, and Health Care Use Analyses

**eTable 1.** Raw Differences Between Groups in Primary and Secondary Outcomes, Summary Statistics

**eTable 2.** Differences Between Groups in Primary and Secondary Outcomes, Inferential Statistics, Unadjusted

**eTable 3.** Snapshot Models for Patients for the 6-Week Periods Preceding Baseline, 6 Months, and 12 Months

**eTable 4.** Cumulative Models for Patients for 6 Months and 12 Months, Patients With Complete Data Only

**eReferences**

This supplementary material has been provided by the authors to give readers additional information about their work.

**eMethods 1. Palliative Care Needs Assessment Tool—Parkinson Disease**

STUDY ID#: \_\_\_\_\_

DATE: \_\_\_\_\_

|                                                                                                                     |          |          |
|---------------------------------------------------------------------------------------------------------------------|----------|----------|
| <b>Section 1a: Red Flags – If present, be alert for unmet palliative care need:</b>                                 | <b>Y</b> | <b>N</b> |
| Red flag symptoms? (Persistent hallucinations / >2 Falls / Aspiration / Hoehn and Yahr 3 -see guidance for details) |          |          |
| Admission to residential or nursing care?                                                                           |          |          |
| <b>Section 1b: Priority referral for further assessment:</b>                                                        | <b>Y</b> | <b>N</b> |
| No carer?                                                                                                           |          |          |

| <b>Section 2: PATIENT WELLBEING (“Does the patient have.....”)</b>                                                                                                                                                                                                                       | <b>Level of Concern</b> |                    |             |
|------------------------------------------------------------------------------------------------------------------------------------------------------------------------------------------------------------------------------------------------------------------------------------------|-------------------------|--------------------|-------------|
| Who provided this information?<br>Patient <input type="checkbox"/> Carer <input type="checkbox"/> Both <input type="checkbox"/>                                                                                                                                                          | None                    | Some/<br>Potential | Significant |
| Unresolved physical symptoms? (Motor / Non-motor)                                                                                                                                                                                                                                        |                         |                    |             |
| Unresolved psychological or neuropsychiatric symptoms?                                                                                                                                                                                                                                   |                         |                    |             |
| Problems with daily living activities?                                                                                                                                                                                                                                                   |                         |                    |             |
| Spiritual or existential concerns?                                                                                                                                                                                                                                                       |                         |                    |             |
| Financial or legal concerns?                                                                                                                                                                                                                                                             |                         |                    |             |
| Health beliefs, cultural or social factors making care delivery complex?                                                                                                                                                                                                                 |                         |                    |             |
| <b>Information needs:</b> Prognosis <input type="checkbox"/> Diagnosis <input type="checkbox"/> Treatment options <input type="checkbox"/><br>Financial/legal issues <input type="checkbox"/> Support services <input type="checkbox"/> Social/emotional issues <input type="checkbox"/> |                         |                    |             |

| <b>Section 3: ABILITY OF CARER OR FAMILY TO CARE FOR PATIENT (“Is the Carer / Family.....”)</b>                                                                                                                                                                                              | <b>Level of Concern</b> |                    |             |
|----------------------------------------------------------------------------------------------------------------------------------------------------------------------------------------------------------------------------------------------------------------------------------------------|-------------------------|--------------------|-------------|
| Who provided this information?<br>Patient <input type="checkbox"/> Carer <input type="checkbox"/> Both <input type="checkbox"/>                                                                                                                                                              | None                    | Some/<br>Potential | Significant |
| Distressed about the patient’s symptoms? (Motor / Non-motor / neuro-psychiatric)                                                                                                                                                                                                             |                         |                    |             |
| Having difficulty providing physical care?                                                                                                                                                                                                                                                   |                         |                    |             |
| Having difficulty coping?                                                                                                                                                                                                                                                                    |                         |                    |             |
| Concerned about financial or legal issues?                                                                                                                                                                                                                                                   |                         |                    |             |
| Experiencing problems that are interfering with inter-personal relationships or functioning?                                                                                                                                                                                                 |                         |                    |             |
| <b>Information needs:</b> Prognosis <input type="checkbox"/> The diagnosis <input type="checkbox"/> Treatment options <input type="checkbox"/><br>Financial/legal issues <input type="checkbox"/> Support services <input type="checkbox"/> Social/emotional issues <input type="checkbox"/> |                         |                    |             |

| <b>Section 4: CARER/FAMILY WELLBEING “Carer or family experiencing.....”</b> | <b>Level of Concern</b> |                    |             |
|------------------------------------------------------------------------------|-------------------------|--------------------|-------------|
|                                                                              | None                    | Some/<br>Potential | Significant |
| Problems that are interfering with their wellbeing or functioning?           |                         |                    |             |
| Grief over the impending or recent death of the patient?                     |                         |                    |             |

**Comments:**

## ISSUES TO CONSIDER WHEN RATING LEVEL OF CONCERN

### RED FLAGS – If present consider further assessment by own team +/- SPCS if required

**Visual hallucinations** – “yes” if hallucinations are formed and persistent. Do not include if associated with inter-current illness or medication change.  
**Recurrent falls** – “yes” if multiple (>2) falls have occurred. Single, isolated falls, even in the context of injury, should not be included here.  
**Pneumonia / choking** – May indicate aspiration and should trigger further palliative review in addition to SLT where appropriate.  
**Hoehn and Yahr stage 3** (Bilateral disease, mild to moderate disability and impaired postural reflexes) is associated with reduced quality of life.  
**24 hour care** – admission to either residential or nursing care should trigger exploration of further supportive and palliative care needs.  
**Failure to attend clinic** – may indicate physical or social difficulties, change in circumstance or acute admission preventing attendance.

### PATIENT WELLBEING

#### Physical symptoms

- Fatigue, drowsiness, Pain, Constipation, Poor sleep, Urinary urgency, frequency, or incontinence, swallowing difficulty, SOB, Drooling, Spasms.

#### Activities of daily living

- Is the patient having difficulty with toileting, showering, bathing, or food preparation?
- Do they require more information to maximise their daily function –see below

#### Neuro-psychiatric / Psychological - “Does the patient have....”

- Thinking or memory problems, which interfere with wellbeing / relationships?
- Hallucination or behavioural issues which require assistance or evidence of psychosis?
- Sustained lowering of mood, tearfulness or guilt? Loss of pleasure in usual activities? Feelings of anxiety, apprehension, anger or fearfulness?
- Is the patient struggling with the implications of, or emotional response to the diagnosis?
- Is the patient requesting a hastened death?

#### Spiritual/Existential – “Is the patient....”

- Feeling isolated or hopeless?
- Feeling that life has no meaning or that his/her life has been wasted?
- Having difficulty thinking about the future?
- Requiring assistance in finding appropriate spiritual resources or services?

#### Financial/Legal concerns

- Consider loss of income, costs of treatment, travel expenses, equipment, or future care needs (such as residential care)?
- Is the family socio-economically disadvantaged?
- Is the patient or family aware of the various financial schemes available and do they need assistance in accessing these (e.g. social worker)?
- Are there conflicting opinions between patient and family relating to legal issues such as end-of-life care options and advance care plans?

#### Health Beliefs, Social and Cultural – “Does the patient or family...”

- Have beliefs or attitudes that make health care provision difficult – for example believing that palliative / hospice care is not available to them?
- Have communication difficulties – consider language and disease related issues (hypophonia / freezing of speech)?
- Feel socially isolated? If so are they avoiding peer support groups due to concerns such as “downward comparison”?
- Need information passed on to a particular member of the family or cultural group?
- Want information about prognosis to be withheld from the patient, or are they reluctant to discuss prognosis? If so, has this been explored?
- Have logistical difficulties accessing services (distance, transport, cost)?

#### Information – “Is the patient aware of/that....”

- Available services and do they need assistance accessing these? (e.g. financial /legal assistance, psychological services, support groups, pastoral care.)
- Advance Care Planning (ACP) and have their views / attitudes towards it been explored?
- PD is progressive, incurable and shortens life?
- Does the patient want more information about the course and prognosis of the disease and treatment options?

### ABILITY OF CARER OR FAMILY TO CARE FOR PATIENT

#### Physical symptoms

- Are the patient’s physical symptoms causing the carer and/or family distress?

#### Providing physical care

- Is the carer having difficulty coping with activities of daily living, medical regimes or practical issues such as equipment and transport?
- Have they received all the practical information they require?

#### Neuro-psychiatric / Psychological – “Is the carer / family...”

- Having difficulty coping with the patient’s memory problems, hallucinations or behavioural issues?
- Having difficulty coping with the patient’s psychological symptoms (esp. anxiety and depression)?
- Requesting a hastened death for the patient?

#### Family and Relationships

- Is there any communication breakdown or conflict between the patient and family over prognosis, treatment options or care giving roles?
- Is the patient particularly concerned about the impact of the illness on the carer or family?
- Is the disease having an adverse effect on the relationship between patient and carer? (May wish to consider impact of physical, psychological and personal cares, sexual dysfunction and change to previous roles within relationship.)

#### Information – “Do/are the carer or family...”

- Require more information about the course and prognosis of the disease and treatment?
- Aware of available services/ need assistance accessing these? (e.g. Financial/legal psychological services, support groups, pastoral care.)
- Are the information needs of the patient and family congruous?

**CARER AND FAMILY WELLBEING - "Do the carer or family..."**

**Physical and psychosocial**

- Experience physical strain, ill health, fatigue, disturbed sleep? Is there evidence of anxiety, depression or feelings of hopelessness?
- Have spiritual/existential issues that are of concern?
- Currently feel that caring has a net positive or negative affect for them personally and their relationship with the patient?

**Grief (pre and post death)**

- Experience intrusive images, severe emotion, denial of implications of loss to self and neglect of necessary adaptive activities at home or work?
- Know of the progressive nature of PD? Has future care planning been considered? (If patient not capacitous this may include best interest decisions)
- Have access to support services (Such as PD Nurse Specialist, SPC, Local support groups, post bereavement support?)

## **eMethods 2.** Detailed Description of Outpatient Palliative Care Intervention: Training and Experience of the Integrated Palliative Care Team, Logistics of Integrated Palliative Care Clinic Visits, and Goals of Integrated Palliative Care Visits and Team Member Roles

In the review of the original version of this manuscript and our PCORI Final Research Report, Reviewers requested additional details on our intervention. Some of these details can be found in a manuscript on the implementation of Neuropalliative care clinics and our study protocol,<sup>1,2</sup> however other relevant details prompted by Reviewer questions merit additional description.

### **Training and Experience of the Integrated Palliative Care Team**

The palliative medicine physician was the only clinician with formal palliative care training and board certification. The chaplain, social worker and nurse had traditional training for their respective professions and had experience working with Parkinson's disease (PD) as well as working in our Neuropalliative care clinics. In general, we found that training related to their field was easily translated into the outpatient palliative care (PC) context and these professions do not typically receive additional formal training before working in other PC contexts.

Our neurologists had all completed movement disorders fellowships but did not have formal or fellowship training in PC. Notably, the growth of each clinic involved input from a palliative medicine physician who assisted the PD team in shaping and formalizing their clinic. This palliative medicine partner provided formal coaching and mentoring as well as less formal education through curbside consults, interdisciplinary discussions, and care of shared patients. Of note, as these clinics evolved, so too did the involvement of the palliative medicine physician such that their time and input could be reduced and/or their efforts more focused as the palliative neurologist developed greater comfort and skills in key aspects of PC for PD.

Informal training for our palliative neurologists also included the following:

- PC workshops offered at national and international neurology meetings (American Academy of Neurology; International Movement Disorders Society)

PC courses for non-palliative medicine physicians (VitalTalk – [<https://www.vitaltalk.org>], Education in Palliative and End-of-life Care [<https://www.bioethics.northwestern.edu/education/epec.html>])

- Visits and shadowing other outpatient PC programs (neurology, cancer, heart failure)
- Learning by teaching (e.g. preparing lectures on PC-related topics for residency and fellowships)
- Learning by planning (e.g. preparing checklists for this study, quality improvement projects)
- Learning by doing (e.g. leading goals of care discussions, advance care planning, nonmotor symptom management) and through interactions with other interdisciplinary team members (e.g. learning about caregiver support from social worker, grief from chaplain...)

### **Logistics of Integrated Palliative Care Clinic Visits**

As a pragmatic trial, our goal was to compare the effectiveness of two currently available treatment options, namely standard care from a neurologist and PCP, and outpatient Neuropalliative care which was available at a handful of academic centers at the time this trial started. We thus wanted to strike a balance between acknowledging the unique styles of each academic sites' team model and achieving fidelity, replicability and standards across sites. To find this balance we used Checklists (see Appendix 2) to ensure all teams were covering similar material but allowed flexibility for individual clinicians and teams in how they addressed items on the checklist. Of note, team members at all sites contributed to these checklists and feedback on the utility of checklists in improving the quality and consistency of care was high (They are still being used outside of this study at all sites). Visits typically lasted 2.5 hours for new and 2 hours for return patients. Distinguishing features of each clinic were as follows:

*University of Alberta:* Visits at the University of Alberta tended to follow a team-visit model where all

members of the team, including the palliative medicine physician, would see the patient and caregiver at the same time. Scales and other data (e.g. medication reconciliation) would be captured by the nurse, initial history would be led by the palliative neurologist, and other team members would contribute as the visit progressed to make sure that items on their checklists were covered. A key strength of this model was high interdisciplinary interaction and no need for patients to repeat their story; a disadvantage is lower efficiency in terms of individual clinicians' time.

*University of Colorado:* Visits at the University of Colorado followed a sequential model, where patients/caregivers would stay in a room and the physician, chaplain, social worker and nurse would rotate in and out. Each team member used their own checklist and meetings in the AM, mid-day and end of the day, as well as brief verbal handoffs and written notes on a shared whiteboard allowed for interdisciplinary communication. The palliative medicine physician (JK) very rarely saw patients but did provide input for curbside consults and was highly involved in the development of the clinic. This included reviewing notes and meeting with the team monthly during the first year of the study to provide guidance and feedback. Advantages of this model included efficiency and greater one-on-one time with each discipline; a disadvantage was greater effort needed to maintain interdisciplinary communication and the potential that patients/caregivers may have to repeat certain parts of their story.

*University of California San Francisco (UCSF):* Visits at UCSF were generally sequential but would occasionally involve more than one member of the team seeing a patient/caregiver. The palliative medicine physician was present in clinic once a month to see patients handpicked by the team as having greater PC Needs, generally complex symptom management, especially pain, or more complex discussions around goals of care. The UCSF team was also the most frequent user of telemedicine as they had developed greater experience with this model of care through research and through their VA Neuropalliative care clinic.

### **Goals of Integrated Palliative Care Visits and Team Member Roles**

Below we list the general goals of the integrated PC team as well as key team members when notable. Please also see Appendix 2 for detailed checklists for each team member.

- Understanding sources of suffering for the patient and caregiver. These sources, based on Cicely Saunder's concept of Total Pain,<sup>3</sup> could include medical/psychiatric symptoms, difficult emotions (commonly grief, guilt, loneliness and worries about the future), spiritual/existential distress, social challenges, or practical/financial concerns.
- Identifying opportunities for joy for the patient and caregiver. This exploration included understanding sources of meaning, love, and pleasure as well as understanding the patient and caregivers' life prior to the illness.
- Establishing goals of care including both priorities for patient and caregiver's current life (e.g. spending more time with family, getting out of the house, engaging in meaningful activities such as church or being in nature) and potential future needs (e.g. staying at home, options for avoiding unwanted procedures and hospital stays, back-up plans should anything affect primary caregivers ability to provide care).
- Providing education regarding the patient's diagnosis, as needed, as well as a road map for future potential challenges and prognosis (this was brought up by the team and patients and caregivers could direct how much detail they wanted)
- Anticipatory guidance, advance care planning and completion of related paperwork (primarily palliative neurologist with assistance from other team members)
- Systematic assessment and treatment of nonmotor symptoms (primarily palliative neurologist with assistance from other team members [e.g. mindfulness techniques to deal with pain from chaplain]); Palliative neurologist would also assess motor symptoms and could provide suggestions for management to primary neurologist if available.
- Referral for other services, including home-based therapies, outpatient therapies, home palliative

- care or hospice as appropriate
- Caregiver wellbeing, needs, self-care and support (primarily social worker, often with help from chaplain regarding difficult emotions)
  - Difficult emotions, existential or spiritual concerns and means of building resilience (primarily chaplain)
  - Medication reconciliation, initial triage, skin care (if patient chair or bedbound), nutrition, setting up home health services, completion of paperwork, integration of team recommendations (primarily nurse)
  - Palliative medicine physician involvement tended to focus on complex symptom management, especially pain, and complex goals of care discussions
  - Help with care coordination including sending notes to other members of the patient's healthcare team, calling other members of their team for more urgent matters (e.g. coordinating prescribing for pain and controlled substances), providing patients and caregivers with summaries of care and reaching out to patients/caregivers when relevant with follow-up calls

**NEUROLOGIST CHECKLIST – Initial Visit**

REDCap ID/Study ID: \_\_\_\_\_/ \_\_\_\_\_

Date: \_\_\_\_\_

Complete Medical History

History of Parkinson’s disease

- o Recent hospitalizations or other complications

Patient and Caregiver Goals of Care

- o How define quality of life
- o Worries about the future/Fears
- o Sources of support and meaning
- o If caregiver present – any issues of safety, overwhelmed, burnt-out, own health concerns
- o Educational needs
- o Status of Advance Care Plans/Documentation
- o Specific Goals of Care

Review of Systems

- o Psychiatric Symptoms (Anxiety and Depression)
- o Behavioral Issues and Psychosis
- o Edmonton Symptoms Assessment Scale PD
- o Falls, balance and mobility
- o Swallowing, sialorrhea and nutrition (weight changes)
- o Other Symptoms

Review Medications

Allergies and medication side effects

Past Medical and Surgical History

Social History

- o Current Living Situation

Family History

Physical Examination

Review orthostatic vital signs and weight

Motor exam (UPDRS)

Assessment

Review Prognosis and Disease Stage

Reflect Goals

Plan

Safety issues (e.g. home safety, abuse, driving)

Medication changes

Referrals for other services

Heads up to other team members

- o Need for Palliative Care Referral (in clinic or outside)
  - o Complex symptom management (e.g. pain)

Follow-up plan including issues for phone call

Signature: \_\_\_\_\_

Date: \_\_\_\_\_



**REDCap ID/Study ID:** \_\_\_\_\_/ \_\_\_\_\_

**Date:** \_\_\_\_\_

- Interval Medical History
  - Any interval events (e.g. UTI)
  - Changes in functional status
  - Patient and Caregiver Goals of Care
    - Any changes/updates needed to goals
    - Any new issues from caregiver perspective
  - Review of Systems
    - Psychiatric Symptoms (Anxiety and Depression)
    - Behavioral Issues and Psychosis
    - Edmonton Symptoms Assessment Scale PD
    - Falls, balance and mobility
    - Swallowing, sialorrhea and nutrition
    - Other Symptoms
  - Review Medications
  - Social History
    - Changes in living situation
- Physical Examination
  - Any change in weight; repeat orthostatic vital signs if relevant
  - Motor exam (UPDRS)
- Assessment
  - Review Prognosis and Disease Stage
  - Reflect Goals
- Plan
  - Safety issues (e.g. home safety, abuse, driving)
  - Medication changes
  - Referrals for other services
  - Heads up to other team members
  - Need for Palliative Care Referral (in clinic or outside)
    - Complex symptom management (e.g. pain)
  - Follow-up plan including issues for phone call

**Signature:** \_\_\_\_\_

**Date:** \_\_\_\_\_

**REDCap ID/Study ID:** \_\_\_\_\_/ \_\_\_\_\_

**Date:** \_\_\_\_\_

**SUPPORT SITUATION FOR PATIENT:**

- Partner
- Family
- Friends
- Neighbors

**ASSESSMENT OF CURRENT LIVING ENVIRONMENT:**

Independent

- Address safety in home - Physical, emotional and sexual abuse
- System to prepare medications, Dr. appointments
- Adaptive equipment
- Assistance at home: Home health, R.N., C.N.A., P.T., O.T.
- Has there been a home safety evaluation
- Non-medical Care
- Transportation
- Mental Health Support

**LONG TERM CARE NEEDS:**

- Assisted Living/Skilled Nursing
- Medication plan at facility
- Response time: Are needs being met
- Transportation, adaptive equipment
- Hospice

**CAREGIVER DISTRESS:**

- Assessment of Partner's physical and emotional health,(abuse by P.W.P)
- Resources in the community for respite care, Adult Day Care Programs
- Support group for Caregiver
- Mental health support system, i.e. Psychologist, counselor
- Back up plan to care for P.W.P. if unable to.

**FINANCIAL ISSUES AND CONCERNS:**

- Employed currently - Assess if have short term - long term insurance
- Health Insurance coverage
- Medicare
- Medicaid eligibility
- Qualifications for Social Security Disability Income or Supplemental Security Income

PLAN:

Referrals for resources in the community:

- Elder law attorney for Power of Attorney, Guardianship, Conservatorship, finances, Disability Denials
- Funding assistance for medications, medical equipment
- Support groups
- Local Parkinson Association
- Counselors for chronic illness
- If needed, local county Adult Protection
- Provide educational forums on Parkinson's in the community
- Web sites: Michael J. Fox, Davis Phiney Foundation and National Parkinson Association

Follow up phone call to address further needs of patient and family.

Signature: \_\_\_\_\_

Date: \_\_\_\_\_

**REDCap ID/Study ID:** \_\_\_\_\_ / \_\_\_\_\_

**Date:** \_\_\_\_\_

REVIEW OF SUPPORT SYSTEM CHANGES:

- Partner
- Family
- Friends
- Neighbors

CURRENT LIVING SITUATION:

Independent

- Address safety in home - Physical, emotional and sexual abuse
- System to prepare medications, Dr. appointments
- Adaptive equipment
- Assistance at home: Home health, R.N., C.N.A., P.T., O.T.
- Has there been a home safety evaluation
- Non-medical Care
- Transportation
- Mental Health Support

LONG TERM CARE NEEDS:

- Assisted Living/Skilled Nursing
- Medication plan at facility
- Response time - Are needs being met
- Transportation, adaptive equipment
- Hospice

CAREGIVER DISTRESS:

- Assessment of Partner's physical and emotional health,(abuse by P.W.P)
- Resources in the community for respite care, Adult Day Care Programs
- Support group for Caregiver
- Mental health support system Psychologist, counselor
- Back up plan to care for P.W.P. if unable to.

FINANCIAL ISSUES AND CONCERNS:

- Employed currently - Assess if have short term - long term insurance
- Health Insurance coverage
- Medicare
- Medicaid eligibility
- Qualifications for Social Security Disability Income or Supplemental Security Income

If moved to Assisted Living, S.N.F., or Hospice since last visit, address eligibility for qualifications for Medicaid.

PLAN:

Referrals for resources in the community:

Elder law attorney for Power of Attorney, Guardianship, Conservatorship, finances, Disability Denials

Funding assistance for medications, medical equipment

Support groups

Local Parkinson Association

Counselors, Psychologists for chronic illness

If needed, local county Adult Protection

Provide educational forums on Parkinson's in the community

Web sites: Michael J. Fox, Davis Phiney Foundation and National Parkinson Association

**Signature:** \_\_\_\_\_

**Date:** \_\_\_\_\_

**REDCap ID/Study ID:** \_\_\_\_\_/\_\_\_\_\_

**Date:** \_\_\_\_\_

**Spiritual Wellbeing**

- Anger, frustration
- Fear, anxiety
- Guilt, feeling like a burden
- Grief, sadness, depression
- Demoralization, sense of helplessness

**Sources of Stress**

- Physical
- Emotional
- Social
- Spiritual

**Sources of Meaning**

- Purpose, happiness, gratitude, and joy
- Belief system, values, importance of faith and/or spirituality

**Sources of Support**

- Primary caregiver
- Family
- Other relationships
- Faith group, friends, and/or community groups
- Personal strengths and positive qualities
- Stress reduction practices and activities
- Spiritual practices and/or rituals

**Hopes**

- Goals and hopes
- Life completion tasks
- Personal and relational life closure

**Care Plan and Recommendations**

- Continued spiritual support
- Referral to others: counselor, faith and/or support group
- Education on practices and activities, coping

**\*For follow-up/return visits: Review for any changes**

**Signature:** \_\_\_\_\_

**Date:** \_\_\_\_\_

**REDCap ID/Study ID:** \_\_\_\_\_/\_\_\_\_\_

**Date:** \_\_\_\_\_

- Medication reconciliation at beginning of visit**
- Primary concerns for patient** (What should we focus on today?)
- Primary concerns for caregiver** (if present)
- Health care proxy designation and documentation**
- Advanced care planning and documentation**
- Home safety and home health care needs**
- Assess for home palliative care or hospice needs**
- Nutritional status and diet**
- MOCA** (for baseline, 6 and 12 month visits)
- For high risk patients [e.g., bedbound or incontinent]**
  - Assess skin integrity
  - Need for home care for wound or skin care

**Signature:** \_\_\_\_\_

**Date:** \_\_\_\_\_

---

**PATIENT HEALTH CARE UTILIZATION – BASELINE VISIT** Rev 5/17/16

FIRST SECTION: The following questions are about **health care services** received in the last 6 weeks. (*Questions may be asked of the caregiver or the patient.*)

**PT1.** During the past 6 weeks, how many times have you gone to a hospital emergency room?  
(*This includes emergency room visits that resulted in a hospital admission.*)

None

One or more

*If One or more, How Many? \_\_\_\_\_*

Declined

Don't know

**PT2.** During the past 6 weeks, how many times have you been a patient in a hospital overnight?  
(*This includes hospital admissions as a result of going to an emergency room.*)

None (**SKIP: Go to question PT6**)

One or more

*If One or more, How Many? \_\_\_\_\_*

*Then Ask questions PT3, PT4, and PT5)*

Declined (**SKIP: Go to question PT6**)

Don't know (**SKIP: Go to question PT6**)

*If PT2 is one or more, ask follow-up questions PT3, PT4, PT5:*

**PT3.** During any of those hospital stays did you spend any time in an intensive care or critical care unit?

No

Yes

Declined

Don't know

**PT4.** During any of those hospital stays did you use life support equipment, such as a respirator?

No

Yes

Declined

Don't know

**PT5.** During any of those hospital stays did you receive antibiotics to treat pneumonia?

No

Yes



- Declined
- Don't know

**PT6.** During the past 6 weeks, how many days or nights have you been a patient in a nursing home or other long-term care facility?

- None
- One or more days or nights  
*If One or more days or night, How Many? \_\_\_\_\_*
- Declined
- Don't know

**PT7.** During the past 6 weeks, did any medically-trained person come to your home to help you?  
*We only want to include help given to you by outside medically-trained personnel, not help provided to you by your caregiver. Include hospice care received at home. (Definition: medically-trained persons include professional nurses, visiting nurse's aides, physical or occupational therapists, chemo therapists, respiratory oxygen therapists, and hospice caregivers)*

- No (**SKIP: Go to question PT10**)
- Yes (*If Yes: Ask follow-up questions: PT8 & PT9*)
- Declined (**SKIP: Go to question PT10**)
- Don't know (**SKIP: Go to question PT10**)

*If PT7 is Yes, ask follow-up questions PT8 and PT9:*

**PT8.** Which of the following medical services did they provide?

*(Check all that apply)*

- Nursing
- Physical therapy
- Occupation therapy
- Respiratory therapy
- Chemo therapy
- Hospice care
- Other-Describe: \_\_\_\_\_
- Don't know

**PT9.** On average over the past 6 weeks, how many times did a medically-trained person come to your home to help you during a typical week?

- None
- One or more times  
*If One or more, How Many? \_\_\_\_\_*
- Declined
- Don't know

**PT10.** In the past 6 weeks, did you use any special facility or services that we haven't talked about, such as an adult day care center or an outpatient rehabilitation program?

- No (**SKIP: Go to question PT13**)
- Yes (*If YES, ask follow-up questions PT11 and PT12*)
- Declined (**SKIP: Go to question PT13**)
- Don't know (**SKIP: Go to question PT13**)

*If PT10 is Yes, ask follow-up questions PT11 and PT12:*

**PT11.** Which special facility or services did he/she use?

*(Check all that apply)*

- Adult day care center
- Outpatient rehabilitation
- Other (*Record description:* \_\_\_\_\_)
- Declined
- Don't know

**PT12.** On average over the past six weeks, how many times did you use the special facility or services to help him/her during a typical week?

- (**Record Number**) Number of times
- Declined
- Don't know

**PT13.** During the past 6 weeks, how many times have you seen or talked to a social worker or religious/spiritual counselor (*Include both home and/or office visits*)?

- None
- (**Record number**) Number of times
- Declined
- Don't know

**PT14-Question not applicable at Baseline Visit. Next question is PT 15.**

NEXT SECTION: The next questions are about **falling down**:

**PT15.** During the past 6 weeks, have you fallen down?

No (**SKIP: Go to question PT21**)

Yes (*If YES, ask the follow-up questions PT16 and PT17*)

Declined (**SKIP: Go to question PT21**)

Don't know (**SKIP: Go to question PT21**)

*If PT14 is Yes, ask follow-up questions PT16 and PT17:*

**PT16.** How many times have you fallen down in the past 6 weeks?

One or more

*If One or more, How Many? \_\_\_\_\_*

Declined

Don't know

**PT17.** In that fall/In any of these falls, did you injure yourself seriously enough to need medical treatment?

No (**SKIP: Go to question PT21**)

Yes (*If YES, ask follow-up questions PT18 thru PT20*)

Declined (**SKIP: Go to question PT21**)

Don't know (**SKIP: Go to question PT21**)

**PT18.** Did you visit your doctor because you were hurt from the fall?

No

Yes

Declined

Don't know

**PT19.** Did you visit the emergency department because you were hurt from the fall?

No

Yes

Declined

Don't know

**PT20.** Were you admitted to the hospital because of the fall?

No

Yes

Declined

Don't know

NEXT SECTION: The following questions are regarding **hospice care** the patient may have received during the past 6 weeks:

**PT21.** Other than the overnight stays you just told me about, during the past 6 weeks, how many nights have you spent in an inpatient hospice facility (*Such as a nursing, long-term care, or rehabilitation facility*)?

None

One or more nights

*If One or more nights, HowMany? \_\_\_\_\_*

Declined

Don't know

**PT22.** Has there been any change in the palliative care services or hospice services that you have received over the last 6 weeks?

No

Yes

**If yes, please explain:** \_\_\_\_\_  
\_\_\_\_\_

NEXT SECTION: The following questions are regarding the patient's **daily activities and current work situation** during the past 7 days, not including today.

**Ask ALL Patients to answer PT 28 (whether or not they are working):**

**(Note that PT 28 intentionally appears out of order to maintain original question numbering in REDCap.)**

**PT28.** During the past 7 days, how much did your health problems affect your ability to do your regular daily activities, **other than work at a job?**

*[By regular activities, we mean the usual activities you do, such as work around the house, shopping, childcare, exercising, studying, etc. Think about times you were limited in the amount or kind of activities you could do and times you accomplished less than you would like. If health problems affected your activities only a little, choose a low number. Choose a high number if health problems effected your activities a great deal.]*

*Consider only how much your health problems affected your ability to do your regular daily activities, other than work at a job.*

**CIRCLE A NUMBER BETWEEN 0 and 10:**

0=Health problems had no effect on my daily activities

10=Health problems completely prevented me from doing my daily activities

0 1 2 3 4 5 6 7 8 9 10

**PT23.** Did you work at a job or business at any time over the past 7 days (*Include any temporary, part-time, or seasonal work if even for a few days*)?

\_\_\_ No (**Ask follow up question PT24.**)

\_\_\_ Yes (**SKIP: Go to questions PT25 thru PT 31**)

***If PT 23 is No, ask follow up question PT24:***

**PT24.** What was the main reason you were not working this past week?  
(*Read list only if respondent is having difficulty answering the question*)

\_\_\_ 1 Ill or disabled and unable to work

\_\_\_ 2 Taking care of home or family

\_\_\_ 3 Going to school

\_\_\_ 4 Retired

\_\_\_ 5 No work available

\_\_\_ 6 Other (**Specify:** \_\_\_\_\_)

**---END OF INTERVIEW for patients that have not worked over the past 7 days.**

***If PT 23 is yes (patient HAS worked over the past 7 days), ask questions PT25-PT31:***

**PT25.** During the past 7 days, how many hours did you actually work?

\_\_\_\_\_ Hours (*Record number of hours*)

\_\_\_\_\_ Don't know

**PT26.** During the past 7 days, how many hours did you miss from work because of your health problems (*Include hours you missed on sick days, times you went in late, left early, etc., but do not include time you missed to participate in this study*)?

\_\_\_\_\_ Hours (*Record number of hours*)

\_\_\_\_\_ Don't know

**PT27.** During the past 7 days, how much did your health problems affect your productivity while you were working?

*[Think about days you were limited in the amount or kind of work you could do, days you accomplished less than you would like, or days you could not do your work as carefully as usual. If health problems affected your work only a little, choose a low number. Choose a high number if health problems effected your work a great deal.]*

Consider only how much your health problems effected productivity while you were working:

**CIRCLE A NUMBER between 0 and 10:**

|                                   |   |   |   |   |   |   |   |   |   |   |    |                                              |
|-----------------------------------|---|---|---|---|---|---|---|---|---|---|----|----------------------------------------------|
| 0=Health                          |   |   |   |   |   |   |   |   |   |   |    | 10=Health                                    |
| problems had no effect on my work | 0 | 1 | 2 | 3 | 4 | 5 | 6 | 7 | 8 | 9 | 10 | problems completel prevented me from working |

**PT28 – Question was moved and appears after PT22.**

**PT29.** Are you employed by government, by a PRIVATE company, a non-profit organization, or are you self-employed or working in a family business?

- Government
- Private for-profit company
- Non-profit organization including tax exempt and charitable organizations
- Self employed
- Working in family business
- Don't know

**PT30.** What kind of business or industry is this?

*(Select only **one**)*

- Manufacturing (e.g., food, beverage, wood or paper products, printing, petroleum/chemical)
- Construction (e.g., building, heavy/civil engineering)
- Natural Resources, agriculture and mining (e.g., crop/animal production, forestry/lopping, oil/gas extraction, mining)
- Retail (e.g., motor vehicle, furniture, electronics/appliance, food/beverage, gasoline station)
- Wholesale trade (e.g., durable, nondurable goods)
- Information (e.g., publishing, motion picture & sound, telecommunications, data processing)
- Financial activities (e.g., banking, credit, securities, insurance carriers)
- Education and Health Services (e.g., educational services, health care and social assistance)
- Something else (**Describe:** \_\_\_\_\_)

**PT31.** Please choose the category that best describes your main job. *If none of the categories fit you exactly, please respond with the closest category to your experience.*

***(Select only one.)***

\_\_\_ Executive, administrator, or senior manager (e.g., CEO, sales VP, plant manager)

\_\_\_ Professional (e.g., engineer, accountant, systems analyst)

\_\_\_ Technical support (e.g., lab technician, legal assistant, computer programmer)

\_\_\_ Sales (e.g., sales representative, stockbroker, retail sales)

\_\_\_ Clerical and administrative support (e.g., secretary, billing clerk, office supervisor)

\_\_\_ Service occupation (e.g., security officer, food service worker, janitor)

\_\_\_ Precision production and crafts worker (e.g., mechanic, carpenter, machinist)

\_\_\_ Chemical/Production Operator (e.g., shift supervisors and hourly employees)

\_\_\_ Laborer (e.g., truck driver, construction worker)

**---END OF INTERVIEW for patients that HAVE worked over the past 7 days**



---

## **CAREGIVER HEALTH CARE UTILIZATION – BASELINE VISIT**

FIRST SECTION: The following questions are about your **health and the health care** you {caregiver} have received in the last 6 weeks.

**CG1.** During the past 6 weeks, how many times have you gone to a hospital emergency room about your own health? *(This includes emergency room visits that resulted in a hospital admission)*

None

One or more

*If One or more, How Many? \_\_\_\_\_*

Declined

Don't know

**CG2.** During the past 6 weeks, how many times have you been a patient in a hospital overnight? *(This includes hospital admissions as a result of going to an emergency room.)*

None

One or more

*If One or more, How Many? \_\_\_\_\_*

Declined

Don't know

**CG3.** During the past 6 weeks, how many times have you seen or talked to a medical doctor about your health, including clinic visits or house calls? *(Not counting the hospital or emergency room doctors.)*

None

One or more

*If One or more, How Many? \_\_\_\_\_*

Declined

Don't know

**CG4.** During the past 6 weeks, how many times have you seen or talked to a mental health professional, such as a psychiatrist, psychologist, psychiatric nurse, or clinical social worker, about your own health? *(Not counting the visits you've already told me about.)*

None

One or more

*If One or more, How Many? \_\_\_\_\_*

Declined

Don't know

NEXT SECTION: The next questions are about “**non-medical**” services you might have received during the past 6 weeks.

**CG5.** During the past six weeks, how many times have you seen or talked to a social worker or religious/spiritual counselor? (*Including both home and/or office visits*)

None

One or more

*If One or more, How Many? \_\_\_\_\_*

Declined

Don't know

**CG6. Question not applicable at Baseline Visit. Next question is CG7.**

**CG7.** During the past 6 weeks, has the patient used respite care (*which is a short-term temporary stay at a nursing facility to give you a break*)?

None

One or more

*If One or more, How Many? \_\_\_\_\_*

Declined

Don't know

NEXT SECTION: The next questions are about your {caregiver} **current work situation** during the past 7 days, not including today.

**Ask ALL Caregivers to answer CG14 (whether or not they are working):**  
*(Note that CG14 intentionally appears out of order to maintain original question numbering in REDCap.)*

**CG14.** During the past 7 days, how much did the **patient’s health problems** affect your ability to do your regular daily activities, other than work at a job?

*By regular activities, we mean the usual activities you do, such as work around the house, shopping, childcare, exercising, studying, etc. Think about times you were limited in the amount or kind of activities you could do and times you accomplished less than you would like. If health problems affected your activities only a little, choose a low number. Choose a high number if health problems affected your activities a great deal.*

Consider only how much health problems affected your ability to do your regular daily activities, other than work at a job.

**CIRCLE A NUMBER between 0 and 10:**

|                       |   |   |   |   |   |   |   |   |   |   |    |                  |
|-----------------------|---|---|---|---|---|---|---|---|---|---|----|------------------|
| 0=Health problems had |   |   |   |   |   |   |   |   |   |   |    | 10=Health        |
| effect on my daily    | 0 | 1 | 2 | 3 | 4 | 5 | 6 | 7 | 8 | 9 | 10 | h                |
| activities            |   |   |   |   |   |   |   |   |   |   |    | completely       |
|                       |   |   |   |   |   |   |   |   |   |   |    | prevented me     |
|                       |   |   |   |   |   |   |   |   |   |   |    | from doing my    |
|                       |   |   |   |   |   |   |   |   |   |   |    | daily activities |

**CG8.** Did you work at a job or business at any time over the past 7 days? *(Include temporary, part-time, or seasonal work even if for a few days)*

- Yes (**SKIP: Go to question CG10**)
- No (**If NO, then go to Follow-up question CG9**)

**CG9.** What was the main reason you did not working this past week?  
*(Read list only if respondent is having difficulty answering the question)*

- 1 Ill, or disabled and unable to work
- 2 Taking care of home or family
- 3 Going to school
- 4 Retired
- 5 No work available
- 6 Other (Specify: \_\_\_\_\_)

**(AFTER answering CG9 and caregiver is not currently working, SKIP to CG20.)**

Answer questions **CG10** through **CG 13** if caregiver IS currently working:

**CG10.** During the past 7 days, how many hours did you actually work?

\_\_\_\_\_ Hours (*Record number of hours*)

\_\_\_\_\_ Don't know

**CG11.** During the past 7 days, how many hours did you miss from work because of **your health problems**? (*Include hours you missed on sick days, times you went in late, left early, etc., because of your health problems. Do not include time you missed to participate in this study*)

\_\_\_\_\_ Hours (*Record number of hours*)

\_\_\_\_\_ Don't know

**CG12.** During the past 7 days, how many hours did you miss from work because of the **patient's health problems**? (*Include hours you missed, times you went in late, left early, etc., because of the patient's health problems or health care needs. Do not include time you missed to participate in this study*)

\_\_\_\_\_ Hours (*Record number of hours*)

\_\_\_\_\_ Don't know

**CG13.** During the past 7 days, how much did the **patient's health problems** affect your productivity **while you were working**?

*Think about days you were limited in the amount or kind of work you could do, days you accomplished less than you would like, or days you could not do your work as carefully as usual. If health problems affected your work only a little, choose a low number. Choose a high number if health problems affected your work a great deal.*

*Consider only how much health problems affected productivity while you were working.*

**CIRCLE A NUMBER between 0 and 10:**

|                 |   |   |   |   |   |   |   |   |   |   |    |              |
|-----------------|---|---|---|---|---|---|---|---|---|---|----|--------------|
| 0=Health        |   |   |   |   |   |   |   |   |   |   |    | 10=Health    |
| problems had    | 0 | 1 | 2 | 3 | 4 | 5 | 6 | 7 | 8 | 9 | 10 | problems     |
| no effect on my |   |   |   |   |   |   |   |   |   |   |    | completel    |
| work            |   |   |   |   |   |   |   |   |   |   |    | prevented me |
|                 |   |   |   |   |   |   |   |   |   |   |    | from working |

If the caregiver HAS been working in the past 7 days continue to **CG15.**

If the caregiver HAS **NOT** been working in the past 7 days go to question **CG20.**

**CG15.** Are you employed by government, by a PRIVATE company, a non-profit organization, or are you self-employed or working in a family business?

- Government
- Private for-profit company
- Non-profit organization including tax exempt and charitable organizations
- Self-employed
- Working for the family business

**CG16.** What kind of business or industry is this?

*(Select only **one**)*

- Manufacturing (e.g., food, beverage, wood or paper products, printing, petroleum/chemical)
- Construction (e.g., building, heavy/civil engineering)
  
- Natural resources, agriculture and mining (e.g., crop/animal production, forestry/lopping, oil/gas extraction, mining)
- Retail (e.g., motor vehicle, furniture, electronics/appliance, food/beverage, gasoline station)
- Wholesale trade (e.g., durable, nondurable goods)
  
- Information (e.g., publishing, motion picture & sound, telecommunications, data processing)
- Financial activities (e.g., banking, credit, securities, insurance carriers)
  
- Education and health services (e.g., educational services, health care and social assistance)
- Something else (**Describe:** \_\_\_\_\_)

**CG17.** Please choose the category that best describes your main job. *If none of the categories fits you exactly, please respond with the closest category to your experience.*

**(Select only one.)**

Executive, administrator, or senior manager (e.g., CEO, sales VP, plant manager)

Professional (e.g., engineer, accountant, systems analyst)

Technical support (e.g., lab technician, legal assistant, computer programmer)

Sales (e.g., sales representative, stockbroker, retail sales)

Clerical and administrative support (e.g., secretary, billing clerk, office supervisor)

Service occupation (e.g., security officer, food service worker, janitor)

Precision production and crafts worker (e.g., mechanic, carpenter, machinist)

Chemical/Production Operator (e.g., shift supervisors and hourly employees)

Laborer (e.g., truck driver, construction worker)

The next questions are about your earnings from your current job.

**CG18.** Are you paid a regular salary or wages?

Salary (**Ask Follow-up question CG19**)

Wages (**Ask Follow-up question CG19**)

Declined

Don't know

**CG19** About how much are you paid before taxes and other deductions?  
Amount (**Specify \$ \_\_\_\_\_**)

Declined

Don't know

**---END OF INTERVIEW for caregivers that have worked over the past 7 days.**

**Question sequences below are for caregivers that have NOT worked in the past seven days.**

The next questions are about the **last job** you had. We're interested in your situation near the end of this job.

**CG20.** In what month and year did you last work?

Month \_\_\_\_\_

Year \_\_\_\_\_

\_\_\_ Don't know

**CG21.** At your last job, were you employed by government, by a PRIVATE company, a non-profit organization, or were you self-employed or working in a family business?

\_\_\_ Government

\_\_\_ Private for-profit company

\_\_\_ Non-profit organization including tax exempt and charitable organizations

\_\_\_ Self employed

\_\_\_ Working for the family business

\_\_\_ Don't know

**CG22.** What kind of business or industry was this?

*(Select only one)*

\_\_\_ Manufacturing (e.g., food, beverage, wood or paper products, printing, petroleum/chemical)

\_\_\_ Construction (e.g., building, heavy/civil engineering)

\_\_\_ Natural resources, agriculture and mining (e.g., crop/animal production, forestry/lopping, oil/gas extraction, mining)

\_\_\_ Retail (e.g., motor vehicle, furniture, electronics/appliance, food/beverage, gasoline station)

\_\_\_ Wholesale trade (e.g., durable, nondurable goods)

\_\_\_ Information (e.g., publishing, motion picture & sound, telecommunications, data processing)

\_\_\_ Financial activities (e.g., banking, credit, securities, insurance carriers)

\_\_\_ Education and health services (e.g., educational services, health care and social assistance)

\_\_\_ Something else (**Describe:** \_\_\_\_\_)

**CG23.** Please choose the category that best describes your main job. *If none of the categories fit you exactly, please respond with the closest category to your experience.*

*(Select only **one**.)*

- Executive, administrator, or senior manager (e.g., CEO, sales VP, plant manager)
- Professional (e.g., engineer, accountant, systems analyst)
- Technical support (e.g., lab technician, legal assistant, computer programmer)
- Sales (e.g., sales representative, stockbroker, retail sales)
- Clerical and administrative support (e.g., secretary, billing clerk, office supervisor)
- Service occupation (e.g., security officer, food service worker, janitor)
- Precision production and crafts worker (e.g., mechanic, carpenter, machinist)
- Chemical/Production operator (e.g., shift supervisors and hourly employees)
- Laborer (e.g., truck driver, construction worker)

The next two questions are about your earnings from that last job.

**CG24.** Were you paid a regular salary or wages?

- Salary (**Ask follow-up question CG25**)
- Wages (**Ask follow-up question CG25**)
- Declined
- Don't know

**CG25.** About how much were you paid before taxes and other deductions?

Amount (specify \$\_\_\_\_\_)

- Declined
- Don't know

**---END OF INTERVIEW for caregivers that have not worked over the past 7 days**



## **eResults. Additional Sensitivity Analyses, Subgroup Analyses, and Health Care Use Analyses**

### **Additional Sensitivity Analyses**

#### **QOL-AD**

The same pattern of statistical significance remained when missing data was filled in with multiple imputation; 6 month estimated treatment effect was 1.82 (95% CI: (0.16, 3.47),  $p = 0.032$ ), and 12 month estimated treatment effect was 1.26 (95% CI: (-0.20, 2.72),  $p = 0.091$ ). QOL for patients and caregivers was jointly modeled so they could contribute information to each other. Factoring cross over in treatment made the estimated treatment effects stronger. For cross over models with covariate adjustment, but without missing data imputation of joint modeling, the estimated treatment effects were 2.48 (95% CI: (1.19, 3.76),  $p = 0.0002$ ) for 6 months, and 1.87 (95% CI: (0.51, 3.24),  $p = 0.0074$ ) for 12 months. When the imputed data and joint modeling is added in, the treatment effect estimates were 2.00 (95% CI: (0.52, 3.49),  $p = 0.009$ ) for 6 months, and 1.48 (95% CI: (0.06, 2.91),  $p = 0.041$ ).

#### **ZBI**

When missing data was filled in with multiple imputation the treatment effects were strengthened; 6-month estimated treatment effect was statistically significant at -2.63 (95% CI: (-4.46, -0.80),  $p = 0.006$ ), and 12-month estimated treatment effect was -2.89 (95% CI: (-4.93, -0.85),  $p = 0.006$ ). For cross over models with covariate adjustment, but without missing data imputation, the estimated treatment effects were -1.61 (95% CI: (-3.23, 0.01),  $p = 0.052$ ) for 6 months, and -2.72 (95% CI: (-4.74, -0.71),  $p = 0.008$ ) for 12 months. When the imputed data is added in, the treatment effect estimates were -2.64 (95% CI: (-4.35, -0.93),  $p = 0.003$ ) for 6 months, and -3.10 (95% CI: (-5.15, -1.05),  $p = 0.004$ ).

### **Subgroup Analyses**

#### **PD (N = 185) vs. Atypical Parkinsonism (N = 25)**

At 6 months the estimated treatment effect for the normal PD patients was 2.13, 95% CI (0.66, 3.59),  $p = 0.0046$  for QOL-AD (patient perspective), and -1.08, 95% CI (-2.88, 0.72),  $p =$

0.2367 for ZBI. At 12 months the estimated treatment effect for the normal PD patients was 1.18, 95% CI (-0.24, 2.60),  $p = 0.1030$  for QOL-AD (patient perspective), and -2.21, 95% CI (-4.33, -0.10),  $p = 0.0403$  for ZBI.

At 6 months the estimated treatment effect for the abnormal PD patients was -0.55, 95% CI (-5.04, 3.94),  $p = 0.8102$  for QOL-AD (patient perspective), and -5.39, 95% CI (-10.20, -0.58),  $p = 0.0285$  for ZBI. At 12 months the estimated treatment effect for the abnormal PD patients was 2.90, 95% CI (-1.53, 7.33),  $p = 0.1977$  for QOL-AD (patient perspective), and -5.17, 95% CI (-10.78, 0.43),  $p = 0.0700$  for ZBI.

At 6 months the estimated difference in treatment effect between abnormal PD and normal PD patients was -2.68, 95% CI (-7.40, 2.05),  $p = 0.2653$  for QOL-AD (patient perspective), and -4.31, 95% CI (-9.46, 0.84),  $p = 0.1001$  for ZBI. At 12 months the estimated difference in treatment effect between abnormal PD and normal PD patients was 1.72, 95% CI (-2.93, 6.38),  $p = 0.4659$  for QOL-AD (patient perspective), and -2.96, 95% CI (-8.97, 3.05),  $p = 0.3312$  for ZBI.

#### Dementia (N = 62) vs. No Dementia (N = 148)

At 6 months the estimated treatment effect for the non-demented patients was 2.01, 95% CI (0.42, 3.60),  $p = 0.0133$  for QOL-AD (patient perspective), and -1.22, 95% CI (-3.24, 0.81),  $p = 0.2360$  for ZBI. At 12 months the estimated treatment effect for the non-demented patients was 1.68, 95% CI (0.11, 3.26),  $p = 0.0360$  for QOL-AD (patient perspective), and -1.45, 95% CI (-3.78, 0.88),  $p = 0.2209$  for ZBI.

At 6 months the estimated treatment effect for the demented patients was 1.33, 95% CI (-1.26, 3.93),  $p = 0.3122$  for QOL-AD (patient perspective), and -2.67, 95% CI (-5.76, 0.42),  $p = 0.0894$  for ZBI. At 12 months the estimated treatment effect for the demented patients was 0.43, 95% CI (-2.20, 3.06),  $p = 0.7463$  for QOL-AD (patient perspective), and -5.21, 95% CI (-8.76, -1.66),  $p = 0.0044$  for ZBI.

At 6 months the estimated difference in treatment effect between demented and non-demented

patients was -0.68, 95% CI (-3.71, 2.35),  $p = 0.6584$  for QOL-AD (patient perspective), and -1.46, 95% CI (-5.12, 2.21),  $p = 0.4335$  for ZBI. At 12 months the estimated difference in treatment effect between demented and non-demented was -1.25, 95% CI (-4.28, 1.78),  $p = 0.4158$  for QOL-AD (patient perspective), and - 3.76, 95% CI (-7.97, 0.45),  $p = 0.0798$  for ZBI.

Advanced PD (Hoehn and Yahr > 3; N = 89) vs. Mild/Moderate (N = 121)

At 6 months the estimated treatment effect for the non-severe patients was 2.28, 95% CI (0.51, 4.05),  $p = 0.0199$  for QOL-AD (patient perspective), and -1.64, 95% CI (-3.81, 0.53),  $p = 0.1364$  for ZBI. At 12 months the estimated treatment effect for the non-severe patients was 1.66, 95% CI (-0.06, 3.37),  $p = 0.0588$  for QOL-AD (patient perspective), and -2.10, 95% CI (-4.62, 0.43),  $p = 0.1034$  for ZBI.

At 6 months the estimated treatment effect for the severe patients was 1.17, 95% CI (-1.11, 3.45),  $p = 0.3142$  for QOL-AD (patient perspective), and -1.51, 95% CI (-4.24, 1.22),  $p = 0.2744$  for ZBI. At 12 months the estimated treatment effect for the severe patients was 0.88, 95% CI (-1.38, 3.15),  $p = 0.4407$  for QOL-AD (patient perspective), and -3.37, 95% CI (-6.50, -0.24),  $p = 0.0351$  for ZBI.

At 6 months the estimated difference in treatment effect between severe and non-severe patients was - 1.11, 95% CI (-4.01, 1.78),  $p = 0.4480$  for QOL-AD (patient perspective), and 0.13, 95% CI (-3.34, 3.60),  $p = 0.9404$  for ZBI. At 12 months the estimated difference in treatment effect between severe and non- severe patients was -0.77, 95% CI (-3.61, 2.07),  $p = 0.5929$  for QOL-AD (patient perspective), and -1.27, 95% CI (-5.27, 2.73),  $p = 0.5302$  for ZBI.

High depressive symptoms (HADS > 11; N = 35) vs. Mild Depressive symptoms (N = 175)

At 6 months the estimated treatment effect for the non-depressed patients was 2.09, 95% CI (0.59, 3.59),  $p = 0.0067$  for QOL-AD (patient perspective), and -1.89, 95% CI (-3.73, -0.04),  $p = 0.0451$  for ZBI. At 12 months the estimated treatment effect for the non- depressed patients was 1.63, 95% CI (0.16, 3.11),  $p = 0.0299$  for QOL-AD (patient perspective), and -3.50, 95% CI (-5.62, -1.39),  $p = 0.0013$  for ZBI.

At 6 months the estimated treatment effect for the depressed patients was 0.40, 95% CI (-3.01, 3.80),  $p = 0.8187$  for QOL-AD (patient perspective), and -0.08, 95% CI (-4.31, 4.15),  $p = 0.9694$  for ZBI. At 12 months the estimated treatment effect for the depressed patients was -0.29, 95% CI (-3.75, 3.17),  $p = 0.8693$  for QOL-AD (patient perspective), and 2.24, 95% CI (-2.67, 7.16),  $p = 0.3685$  for ZBI.

At 6 months the estimated difference in treatment effect between depressed and non-depressed patients was -1.69, 95% CI (-5.41, 2.02),  $p = 0.3693$  for QOL-AD (patient perspective), and 1.80, 95% CI (-2.79, 6.40),  $p = 0.4386$  for ZBI. At 12 months the estimated difference in treatment effect between depressed and non-depressed patients was -1.92, 95% CI (-5.66, 1.82),  $p = 0.3115$  for QOL-AD (patient perspective), and 5.75, 95% CI (0.43, 11.06),  $p = 0.0344$  for ZBI.

### **Health Care Use Analyses**

Snapshot models modeled health care utilization as it changed across time, by counting the utilizations during the 6 weeks preceding each visit. Cumulative models added up all healthcare utilizations during the study preceding the specified time point. Cumulative models could only include patients with complete data across all preceding times. Binary outcomes were analyzed with relative risk models, while count variables were analyzed with negative binomial models, with robust standard errors. For the snapshot models, generalized estimating equations (GEE) were used to account for repeated measures on patients.

**eTable 1.** Raw Differences Between Groups in Primary and Secondary Outcomes, Summary Statistics

| Outcome Measure                         | Time (Months) | Usual Care |       |       | Intervention |       |       |
|-----------------------------------------|---------------|------------|-------|-------|--------------|-------|-------|
|                                         |               | N          | Mean  | SD    | N            | Mean  | SD    |
| QOL-AD                                  | 0             | 101        | 34.29 | 5.60  | 104          | 33.89 | 5.69  |
|                                         | 6             | 94         | 33.29 | 6.04  | 91           | 34.72 | 6.46  |
|                                         | 12            | 84         | 34.37 | 6.38  | 92           | 34.69 | 6.33  |
| QOL-AD Caregiver Perspective on Patient | 0             | 79         | 34.54 | 6.03  | 76           | 32.94 | 5.82  |
|                                         | 6             | 76         | 32.95 | 5.87  | 75           | 34.65 | 5.85  |
|                                         | 12            | 74         | 33.62 | 6.78  | 75           | 34.38 | 6.21  |
| ZBI                                     | 0             | 85         | 16.84 | 7.74  | 86           | 17.93 | 8.02  |
|                                         | 6             | 76         | 15.97 | 7.22  | 75           | 15.04 | 8.06  |
|                                         | 12            | 72         | 16.65 | 7.81  | 75           | 14.87 | 8.85  |
| ESAS-PD                                 | 0             | 100        | 55.63 | 28.17 | 104          | 56.49 | 23.45 |
|                                         | 6             | 90         | 54.30 | 23.84 | 93           | 37.62 | 18.07 |
|                                         | 12            | 85         | 52.99 | 26.45 | 88           | 42.92 | 21.91 |
| PDQ-39                                  | 0             | 100        | 34.27 | 16.51 | 105          | 35.19 | 16.82 |
|                                         | 6             | 88         | 31.96 | 15.62 | 91           | 30.62 | 15.75 |
|                                         | 12            | 86         | 32.05 | 16.08 | 88           | 30.01 | 15.03 |

|                   |    |     |       |       |     |       |       |
|-------------------|----|-----|-------|-------|-----|-------|-------|
| UPDRS Motor Score | 0  | 101 | 37.67 | 17.61 | 104 | 42.81 | 19.44 |
|                   | 6  | 82  | 37.45 | 16.72 | 93  | 37.62 | 18.07 |
|                   | 12 | 79  | 38.59 | 18.64 | 93  | 39.57 | 18.87 |
| MOCA Score        | 0  | 100 | 23.66 | 5.08  | 102 | 23.96 | 4.83  |
|                   | 6  | 77  | 24.40 | 4.81  | 85  | 24.73 | 5.13  |
|                   | 12 | 74  | 23.50 | 5.44  | 83  | 24.86 | 4.12  |
| HADS-Depression   | 0  | 102 | 7.23  | 3.74  | 105 | 7.04  | 3.55  |
|                   | 6  | 87  | 6.77  | 3.73  | 93  | 6.66  | 4.38  |
|                   | 12 | 85  | 6.91  | 3.94  | 87  | 6.44  | 3.83  |
| HADS-Anxiety      | 0  | 102 | 7.73  | 4.43  | 105 | 7.57  | 3.78  |
|                   | 6  | 87  | 6.78  | 4.06  | 93  | 6.32  | 3.70  |
|                   | 12 | 85  | 5.94  | 3.76  | 87  | 6.01  | 4.03  |
| PG-12             | 0  | 99  | 24.35 | 8.61  | 101 | 25.32 | 9.67  |
|                   | 6  | 87  | 23.34 | 8.88  | 89  | 22.39 | 9.53  |
|                   | 12 | 86  | 22.28 | 9.80  | 87  | 21.97 | 8.16  |
| FACIT-Sp          | 0  | 100 | 27.76 | 9.75  | 103 | 28.01 | 9.58  |
|                   | 6  | 89  | 29.05 | 9.04  | 93  | 28.97 | 9.59  |
|                   | 12 | 86  | 30.63 | 10.08 | 87  | 28.99 | 9.59  |
| FACIT-Sp Meaning  | 0  | 100 | 11.00 | 3.33  | 103 | 11.21 | 3.08  |

|                                |    |     |       |      |     |       |      |
|--------------------------------|----|-----|-------|------|-----|-------|------|
|                                | 6  | 89  | 11.50 | 3.00 | 93  | 11.40 | 3.50 |
|                                | 12 | 86  | 11.80 | 3.15 | 87  | 11.70 | 3.43 |
| FACIT-Sp Peace                 | 0  | 100 | 8.56  | 3.49 | 103 | 917   | 3.35 |
|                                | 6  | 89  | 9.42  | 3.41 | 93  | 9.68  | 3.43 |
|                                | 12 | 86  | 9.93  | 3.44 | 87  | 9.47  | 3.59 |
| FACIT-Sp Faith                 | 0  | 98  | 8.16  | 4.86 | 102 | 7.63  | 4.91 |
|                                | 6  | 87  | 8.10  | 4.92 | 93  | 7.89  | 4.58 |
|                                | 12 | 83  | 8.77  | 4.87 | 86  | 7.87  | 4.46 |
| Patient CGIC                   | 0  | NA  | NA    | NA   | NA  | NA    | NA   |
|                                | 6  | 89  | -0.44 | 1.28 | 93  | 0.33  | 1.49 |
|                                | 12 | 82  | -0.55 | 1.31 | 91  | 0.48  | 1.63 |
| Caregiver HADS -<br>Depression | 0  | 87  | 4.09  | 2.79 | 86  | 4.50  | 3.34 |
|                                | 6  | 73  | 3.73  | 2.87 | 74  | 4.03  | 3.50 |
|                                | 12 | 72  | 4.31  | 3.25 | 74  | 4.08  | 3.43 |
| Caregiver HADS -<br>Anxiety    | 0  | 87  | 7.72  | 3.57 | 86  | 7.14  | 3.58 |
|                                | 6  | 73  | 7.08  | 4.12 | 74  | 5.81  | 3.71 |
|                                | 12 | 72  | 6.97  | 3.99 | 74  | 6.36  | 3.97 |
| Caregiver FACIT-Sp             | 0  | 85  | 34.45 | 8.89 | 86  | 32.60 | 8.53 |
|                                | 6  | 73  | 33.95 | 8.06 | 76  | 33.81 | 8.80 |

|                               |    |    |       |      |    |       |      |
|-------------------------------|----|----|-------|------|----|-------|------|
|                               | 12 | 73 | 33.51 | 7.83 | 74 | 33.41 | 9.42 |
| Caregiver FACIT-Sp<br>Meaning | 0  | 85 | 13.93 | 2.38 | 86 | 13.59 | 2.65 |
|                               | 6  | 73 | 13.93 | 2.31 | 76 | 13.58 | 2.63 |
|                               | 12 | 73 | 13.58 | 2.60 | 74 | 13.45 | 2.81 |
| Caregiver FACIT-Sp<br>Peace   | 0  | 85 | 10.33 | 3.44 | 86 | 9.74  | 3.36 |
|                               | 6  | 73 | 10.33 | 3.33 | 76 | 10.66 | 3.26 |
|                               | 12 | 73 | 10.14 | 3.02 | 74 | 10.59 | 3.40 |
| Caregiver FACIT-Sp<br>Faith   | 0  | 83 | 10.06 | 4.96 | 85 | 9.29  | 4.45 |
|                               | 6  | 72 | 9.61  | 4.49 | 75 | 9.56  | 4.96 |
|                               | 12 | 71 | 9.78  | 4.58 | 73 | 9.40  | 5.13 |
| Caregiver CGIC                | 0  | NA | NA    | NA   | NA | NA    | NA   |
|                               | 6  | 73 | -0.74 | 1.28 | 74 | 0.01  | 1.55 |
|                               | 12 | 67 | -0.79 | 1.29 | 69 | 0.42  | 1.82 |



**eTable 2.** Differences Between Groups in Primary and Secondary Outcomes, Inferential Statistics, Unadjusted

| Outcome Measure              | Time (Months) | Usual Care              | Intervention      |                          | Difference Between Groups |                          |                   |
|------------------------------|---------------|-------------------------|-------------------|--------------------------|---------------------------|--------------------------|-------------------|
|                              |               |                         | Estimate (95% CI) | p value                  | Estimate (95% CI)         | p value                  | Estimate (95% CI) |
| QOL-AD                       | 6             | -0.84<br>(-1.68, 0.01)  | 0.048             | 0.66<br>(-0.43, 1.75)    | 0.233                     | 1.50<br>(0.17, 2.83)     | 0.027             |
|                              | 12            | -0.43<br>(-1.37, 0.50)  | 0.361             | 0.68<br>(-0.38, 0.73)    | 0.207                     | 1.11<br>(-0.27, 2.48)    | 0.114             |
| QOL-AD Caregiver Perspective | 6             | -1.40<br>(-2.38, -0.43) | 0.005             | 2.09<br>(0.93, 3.25)     | <0.001                    | 3.49<br>(1.99, 5.00)     | <0.001            |
|                              | 12            | -0.76<br>(-1.75, 0.23)  | 0.132             | 1.81<br>(0.72, 2.90)     | 0.001                     | 2.57<br>(1.11, 4.03)     | <0.001            |
| ZBI                          | 6             | -1.08<br>(-2.28, 0.12)  | 0.076             | -2.28<br>(-3.38, -1.18)  | <0.001                    | -1.20<br>(-2.76, 0.36)   | 0.129             |
|                              | 12            | 0.02<br>(-1.32, 1.37)   | 0.971             | -2.35<br>(-3.69, -1.00)  | <0.001                    | -2.27<br>(-4.11, -0.44)  | 0.016             |
| ESAS-PD                      | 6             | -0.45<br>(-3.86, 2.96)  | 0.800             | -6.81<br>(-10.46, -3.15) | <0.001                    | -6.36<br>(-11.03, -1.69) | 0.008             |
|                              | 12            | -0.73<br>(-4.97, 3.51)  | 0.733             | -9.66<br>(-13.52, -5.80) | <0.001                    | -8.93<br>(-14.34, -3.52) | 0.001             |
| PDQ-39                       | 6             | -1.20<br>(-3.57, 1.18)  | 0.321             | -3.04<br>(-5.13, -0.94)  | 0.005                     | -1.84<br>(-4.87, 1.19)   | 0.233             |

|                   |    |                         |        |                         |        |                         |       |
|-------------------|----|-------------------------|--------|-------------------------|--------|-------------------------|-------|
|                   | 12 | -0.34<br>(-2.66, 1.97)  | 0.768  | -3.04<br>(-5.46, -0.61) | 0.015  | -2.69<br>(-5.91, -0.53) | 0.101 |
| UPDRS Motor Score | 6  | 2.15<br>(0.04, 4.27)    | 0.046  | -2.98<br>(-5.79, -0.18) | 0.037  | -5.14<br>(-8.63, -1.65) | 0.004 |
|                   | 12 | 2.45<br>(-0.36, 5.26)   | 0.086  | -1.38<br>(-4.78, 2.02)  | 0.423  | -3.83<br>(-8.21, 0.55)  | 0.086 |
| MOCA Score        | 6  | -0.14<br>(-0.82, 0.55)  | 0.690  | 0.17<br>(-0.55, 0.90)   | 0.637  | 0.31<br>(-0.67, 1.30)   | 0.534 |
|                   | 12 | -1.05<br>(-1.78, -0.32) | 0.005  | 0.14<br>(-0.57, 0.85)   | 0.700  | 1.19<br>(0.18, 2.20)    | 0.021 |
| HADS - Depression | 6  | -0.20<br>(-0.73, 0.32)  | 0.439  | -0.34<br>(-0.97, 0.30)  | 0.296  | -0.13<br>(-0.93, 0.67)  | 0.728 |
|                   | 12 | 0.121<br>(-0.45, 0.69)  | 0.656  | -0.33<br>(-0.92, 0.25)  | 0.260  | -0.45<br>(-1.26, 0.34)  | 0.263 |
| HADS - Anxiety    | 6  | -0.73<br>(-1.35, -0.11) | 0.022  | -1.19<br>(-1.71, -0.68) | <0.001 | -0.46<br>(-1.23, 0.31)  | 0.237 |
|                   | 12 | -1.42<br>(-2.04, -0.80) | <0.001 | -1.30<br>(-1.91, -0.69) | <0.001 | 0.118<br>(-0.71, 0.95)  | 0.779 |
| PG-12             | 6  | -0.68<br>(-2.05, 0.68)  | 0.323  | -2.63<br>(-3.91, -1.35) | <0.001 | -1.95<br>(-3.75, -0.14) | 0.035 |

|                     |    |                         |        |                         |        |                         |        |
|---------------------|----|-------------------------|--------|-------------------------|--------|-------------------------|--------|
|                     | 12 | -1.31<br>(-2.73, 0.11)  | 0.070  | -2.61<br>(-3.92, -1.31) | <0.001 | -1.30<br>(-3.17, 0.57)  | 0.171  |
| FACIT-Sp            | 6  | 1.10<br>(-0.29, 2.49)   | 0.118  | 1.17<br>(-0.01, 2.35)   | 0.053  | 0.07<br>(-1.68, 1.81)   | 0.939  |
|                     | 12 | 2.30<br>(0.76, 3.83)    | 0.004  | 0.605<br>(-0.828, 2.04) | 0.404  | -1.69<br>(-3.73, 0.34)  | 0.103  |
| FACIT-Sp<br>Meaning | 6  | 0.41<br>(-0.04, 0.87)   | 0.077  | 0.23<br>(-0.26, 0.71)   | 0.359  | -0.19<br>(-0.83, 0.46)  | 0.563  |
|                     | 12 | 0.61<br>(0.08, 1.14)    | 0.024  | 0.42<br>(-0.17, 1.00)   | 0.161  | -0.19<br>(-0.95, 0.56)  | 0.611  |
| FACIT-Sp<br>Peace   | 6  | 0.65<br>(0.07, 1.23)    | 0.028  | 0.57<br>(0.03, 1.11)    | 0.037  | -0.08<br>(-0.83, 0.67)  | 0.839  |
|                     | 12 | 1.09<br>(0.48, 1.70)    | 0.001  | 0.17<br>(-0.48, 0.83)   | 0.598  | -0.91<br>(-1.76, -0.07) | 0.035  |
| FACIT-Sp<br>Faith   | 6  | -0.00<br>(-0.76, 0.76)  | 0.995  | 0.36<br>(-0.23, 0.94)   | 0.229  | 0.36<br>(-0.56, 1.28)   | 0.441  |
|                     | 12 | 0.53<br>(-0.19, 1.24)   | 0.151  | 0.04<br>(-0.52, 0.61)   | 0.878  | -0.48<br>(-1.36, 0.40)  | 0.283  |
| Patient CGIC        | 6  | -0.46<br>(-0.72, -0.19) | 0.001  | 0.29<br>(-0.01, 0.59)   | 0.061  | 0.75<br>(0.35, 1.15)    | <0.001 |
|                     | 12 | -0.59<br>(-0.87, -0.30) | <0.001 | 0.41<br>(0.08, 0.75)    | 0.016  | 1.00<br>(0.57, 1.44)    | <0.001 |

|                             |    |                          |       |                         |       |                        |       |
|-----------------------------|----|--------------------------|-------|-------------------------|-------|------------------------|-------|
| Caregiver HADS - Depression | 6  | -0.20<br>(-0.68, 0.29)   | 0.424 | -0.36<br>(-0.99, 0.28)  | 0.268 | -0.16<br>(-0.94, 0.62) | 0.683 |
|                             | 12 | 0.47<br>(-0.17, 1.12)    | 0.149 | -0.26<br>(-0.85, 0.34)  | 0.398 | -0.73<br>(-1.58, 0.13) | 0.095 |
| Caregiver HADS - Anxiety    | 6  | -0.52<br>(-1.21, 0.16)   | 0.133 | -1.21<br>(-1.90, -0.52) | 0.001 | -0.69<br>(-1.63, 0.26) | 0.153 |
|                             | 12 | -0.40<br>(-1.13, 0.34)   | 0.285 | -0.68<br>(-1.37, 0.02)  | 0.057 | -0.28<br>(-1.27, 0.71) | 0.576 |
| Caregiver FACIT-Sp          | 6  | -0.27<br>(-1.42, 0.89)   | 0.650 | 0.68<br>(-0.57, 1.94)   | 0.283 | 0.95<br>(-0.69, 2.59)  | 0.256 |
|                             | 12 | -0.90<br>(-2.12, 0.31)   | 0.144 | 0.42<br>(-0.81, 1.66)   | 0.495 | 1.33<br>(-0.35, 3.01)  | 0.121 |
| Caregiver FACIT-Sp Meaning  | 6  | -0.05<br>(-0.466, 0.375) | 0.831 | 0.03<br>(-0.37, 0.42)   | 0.897 | 0.07<br>(-0.48, 0.62)  | 0.801 |
|                             | 12 | -0.41<br>(-0.87, 0.05)   | 0.083 | -0.09<br>(-0.54, 0.36)  | 0.694 | 0.32<br>(-0.31, 0.95)  | 0.315 |
| Caregiver FACIT-Sp Peace    | 6  | 0.11<br>(-0.56, 0.78)    | 0.753 | 0.75<br>(0.15, 1.34)    | 0.014 | 0.64<br>(-0.20, 1.48)  | 0.133 |
|                             | 12 | -0.14<br>(-0.71, 0.43)   | 0.627 | 0.67<br>(0.08, 1.27)    | 0.027 | 0.81<br>(0.04, 1.59)   | 0.040 |
| Caregiver FACIT-Sp Faith    | 6  | -0.24<br>(-0.78, 0.31)   | 0.395 | -0.09<br>(-0.74, 0.56)  | 0.784 | 0.15<br>(-0.68, 0.97)  | 0.730 |

|                |    |                         |        |                        |       |                       |        |
|----------------|----|-------------------------|--------|------------------------|-------|-----------------------|--------|
|                | 12 | -0.26<br>(-0.95, 0.42)  | 0.443  | -0.21<br>(-0.75, 0.33) | 0.434 | 0.05<br>(-0.81, 0.91) | 0.914  |
| Caregiver CGIC | 6  | -0.75<br>(-1.04, -0.46) | <0.001 | -0.05<br>(-0.41, 0.30) | 0.764 | 0.70<br>(0.24, 1.15)  | 0.003  |
|                | 12 | -0.81<br>(-1.11, -0.50) | <0.001 | 0.36<br>(-0.07, 0.79)  | 0.086 | 1.17<br>(0.65, 1.69)  | <0.001 |

**eTable 3.** Snapshot Models for Patients for the 6-Week Periods Preceding Baseline, 6 Months, and 12 Months

**A. Have you gone to an emergency room about your own health (yes or no)?**

|           | Sample (Proportion) |                 | Model (Proportion Estimate (95% CI)) |                         |
|-----------|---------------------|-----------------|--------------------------------------|-------------------------|
|           | Usual               | Palliative      | Usual                                | Palliative              |
| Baseline  | 13/103 (0.1262)     | 17/106 (0.1604) | 0.1435 (0.1031, 0.1999)              |                         |
| 6 Months  | 8/92 (0.0870)       | 13/93 (0.1398)  | 0.0888 (0.0466,<br>0.1695)           | 0.1386 (0.0835, 0.2302) |
| 12 Months | 15/87 (0.1724)      | 16/94 (0.1702)  | 0.1747 (0.1114,<br>0.2739)           | 0.1674 (0.1065, 0.2631) |

| Comparison to Baseline (Model) (Ratio (95% CI), p value) |                                    | Palliative vs Usual, Comparison to Baseline (Model) (Ratio-Ratio (95% CI), p value) |  |
|----------------------------------------------------------|------------------------------------|-------------------------------------------------------------------------------------|--|
| Usual                                                    | Palliative                         |                                                                                     |  |
| 0.6190 (0.3063, 1.2511),<br>0.1401                       | 0.9659 (0.5357, 1.7415),<br>0.9073 | 1.5604 (0.6876, 3.5413),<br>0.2846                                                  |  |
| 1.2168 (0.7211, 2.0533),<br>0.4853                       | 1.1661 (0.6783, 2.0049),<br>0.5869 | 0.9583 (0.5079, 1.8081),<br>0.8956                                                  |  |

**B. How many times have you gone to an emergency room about your own health?**

|           | Sample (N, Mean (SD)) |                      | Model (Mean Estimate (95% CI)) |                            |
|-----------|-----------------------|----------------------|--------------------------------|----------------------------|
|           | Usual                 | Palliative           | Usual                          | Palliative                 |
| Baseline  | 103, 0.1845 (0.6824)  | 105, 0.1619 (0.3953) | 0.1733 (0.1122, 0.2675)        |                            |
| 6 Months  | 92, 0.0978 (0.3335)   | 93, 0.1828 (0.5096)  | 0.0982 (0.0493,<br>0.1958)     | 0.1826 (0.1039,<br>0.3210) |
| 12 Months | 87, 0.1954 (0.4534)   | 94, 0.2128 (0.5053)  | 0.1937 (0.1187,<br>0.3159)     | 0.2133 (0.1326,<br>0.3432) |

| Comparison to Baseline (Model) (Ratio (95% CI), p value) |                                    | Palliative vs Usual, Comparison to Baseline (Model) (Ratio (95% CI), p value) | Ratio-Ratio (95% CI), p value) |
|----------------------------------------------------------|------------------------------------|-------------------------------------------------------------------------------|--------------------------------|
| Usual                                                    | Palliative                         |                                                                               |                                |
| 0.5670 (0.2517, 1.2775),<br>0.1497                       | 1.0538 (0.5162, 2.1513),<br>0.8667 | 1.8585 (0.7623, 4.5310),<br>0.1849                                            |                                |
| 1.1177 (0.5786, 2.1592),<br>0.7415                       | 1.2312 (0.6622, 2.2892),<br>0.5217 | 1.1015 (0.5569, 2.1787),<br>0.7809                                            |                                |

**C. Have you been a patient in a hospital overnight (yes or no)?**

|           | Sample (Proportion) |                | Model (Proportion Estimate (95% CI)) |                            |
|-----------|---------------------|----------------|--------------------------------------|----------------------------|
|           | Usual               | Palliative     | Usual                                | Palliative                 |
| Baseline  | 6/103 (0.0583)      | 4/106 (0.0377) | 0.0478 (0.0261, 0.0876)              |                            |
| 6 Months  | 3/92 (0.0326)       | 4/93 (0.0430)  | 0.0315 (0.0099,<br>0.1002)           | 0.0444 (0.0176,<br>0.1115) |
| 12 Months | 3/87 (0.0345)       | 7/94 (0.0745)  | 0.0323 (0.0100,<br>0.1047)           | 0.0765 (0.0381,<br>0.1536) |



| Comparison to Baseline (Model) (Ratio (95% CI), p value) |                                    | Palliative vs Usual, Comparison to Baseline (Model) (Ratio (95% CI), p value) |  |
|----------------------------------------------------------|------------------------------------|-------------------------------------------------------------------------------|--|
| Usual                                                    | Palliative                         |                                                                               |  |
| 0.6584 (0.1733, 2.5007),<br>0.4966                       | 0.9273 (0.3356, 2.5620),<br>0.8830 | 1.4084 (0.3214, 6.1710),<br>0.6385                                            |  |
| 0.6749 (0.1930, 2.3597),<br>0.4951                       | 1.5988 (0.6336, 4.0348),<br>0.3697 | 2.3690 (0.6053, 9.2724),<br>0.1989                                            |  |

**D. How many times have you been a patient in a hospital overnight?**

|           | Sample (N, Mean (SD)) |                      | Model (Mean Estimate (95% CI)) |                            |
|-----------|-----------------------|----------------------|--------------------------------|----------------------------|
|           | Usual                 | Palliative           | Usual                          | Palliative                 |
| Baseline  | 103, 0.0874 (0.4452)  | 106, 0.0378 (0.1915) | 0.0622 (0.0296, 0.1306)        |                            |
| 6 Months  | 92, 0.0326 (0.1786)   | 93, 0.0430 (0.2040)  | 0.0317 (0.0100,<br>0.0999)     | 0.0441 (0.0173,<br>0.1120) |
| 12 Months | 87, 0.0460 (0.2601)   | 94, 0.0745 (0.2639)  | 0.0444 (0.0131,<br>0.1507)     | 0.0757 (0.0375,<br>0.1527) |

| Comparison to Baseline (Model) (Ratio (95% CI), p value) |                                    | Palliative vs Usual, Comparison to Baseline (Model) (Ratio (95% CI), p value) | Ratio-Ratio (95% CI), p value) |
|----------------------------------------------------------|------------------------------------|-------------------------------------------------------------------------------|--------------------------------|
| Usual                                                    | Palliative                         |                                                                               |                                |
| 0.5090 (0.1245, 2.0806),<br>0.3224                       | 0.7085 (0.2310, 2.1728),<br>0.5406 | 1.3919 (0.3170, 6.1110),<br>0.6504                                            |                                |
| 0.7144 (0.1740, 2.9329),<br>0.6227                       | 1.2170 (0.4399, 3.3666),<br>0.7123 | 1.7035 (0.4165, 6.9679),<br>0.4349                                            |                                |

**E. Did any medically trained person come to patient's home to help [him/her] (yes or no)?**

|           | Sample (Proportion) |                 | Model (Proportion Estimate (95% CI)) |                            |
|-----------|---------------------|-----------------|--------------------------------------|----------------------------|
|           | Usual               | Palliative      | Usual                                | Palliative                 |
| Baseline  | 12/103 (0.1165)     | 17/106 (0.1604) | 0.1388 (0.0990, 0.1945)              |                            |
| 6 Months  | 13/92 (0.1413)      | 15/93 (0.1613)  | 0.1506 (0.0951,<br>0.2386)           | 0.1666 (0.1090,<br>0.2547) |
| 12 Months | 19/87 (0.2184)      | 14/94 (0.1489)  | 0.2356 (0.1639,<br>0.3388)           | 0.1577 (0.1003,<br>0.2478) |

| Comparison to Baseline (Model) (Ratio (95% CI), p value) |                                    | Palliative vs Usual, Comparison to Baseline (Model) (Ratio (95% CI), p value) | Ratio-Ratio (95% CI), p value) |
|----------------------------------------------------------|------------------------------------|-------------------------------------------------------------------------------|--------------------------------|
| Usual                                                    | Palliative                         |                                                                               |                                |
| 1.0854 (0.6581, 1.7901),<br>0.7587                       | 1.2007 (0.7633, 1.8887),<br>0.4527 | 1.1062 (0.6061, 2.0188),<br>0.7465                                            |                                |
| 1.6982 (1.0873, 2.6525),<br>0.0428                       | 1.1363 (0.6793, 1.9007),<br>0.6395 | 0.6691 (0.3782, 1.1837),<br>0.1738                                            |                                |

**F. How many times did a medically trained person come to patient's home to help [him/her]?**

|           | Sample (N, Mean (SD)) |                      | Model (Mean Estimate (95% CI)) |                            |
|-----------|-----------------------|----------------------|--------------------------------|----------------------------|
|           | Usual                 | Palliative           | Usual                          | Palliative                 |
| Baseline  | 103, 1.2233 (6.1164)  | 106, 1.3491 (5.1511) | 1.2871 (0.7120, 2.3266)        |                            |
| 6 Months  | 92, 1.0000 (4.6523)   | 93, 1.5376 (5.5454)  | 0.9651 (0.4285,<br>2.1733)     | 1.5766 (0.7458,<br>3.3325) |
| 12 Months | 87, 1.9885 (6.3694)   | 93, 1.3118 (5.8773)  | 2.0508 (1.0726,<br>3.9211)     | 1.2444 (0.4745,<br>3.2636) |

| Comparison to Baseline (Model) (Ratio (95% CI), p value) |                                    | Palliative vs Usual, Comparison to Baseline (Model) (Ratio (95% CI), p value) | Ratio-Ratio (95% CI), p value) |
|----------------------------------------------------------|------------------------------------|-------------------------------------------------------------------------------|--------------------------------|
| Usual                                                    | Palliative                         |                                                                               |                                |
| 0.7498 (0.3674, 1.5304),<br>0.4002                       | 1.2249 (0.5190, 2.8912),<br>0.6562 | 1.6336 (0.5822, 4.5841), 0.3617                                               |                                |
| 1.5933 (0.6588, 3.8537),<br>0.3462                       | 0.9668 (0.3047, 3.0673),<br>0.9493 | 0.6068 (0.1898, 1.9398), 0.3746                                               |                                |

**G. Have you seen or talked to a social worker, therapist, psychologist, or religious/spiritual counselor (outside of the study team; yes or no)?**

|          | Sample (Proportion) |                 | Model (Proportion Estimate (95% CI)) |                            |
|----------|---------------------|-----------------|--------------------------------------|----------------------------|
|          | Usual               | Palliative      | Usual                                | Palliative                 |
| Baseline | 25/96 (0.2604)      | 26/100 (0.2600) | 0.2595 (0.2050, 0.3285)              |                            |
| 6 Months | 23/90 (0.2556)      | 15/93 (0.1613)  | 0.2543 (0.1801,<br>0.3591)           | 0.1632 (0.1033,<br>0.2580) |

|              |                |                |                            |                            |
|--------------|----------------|----------------|----------------------------|----------------------------|
| 12<br>Months | 22/82 (0.2683) | 20/93 (0.2151) | 0.2622 (0.1863,<br>0.3689) | 0.2270 (0.1578,<br>0.3267) |
|--------------|----------------|----------------|----------------------------|----------------------------|

| Comparison to Baseline (Model) (Ratio (95% CI), p value) |                                    | Palliative vs Usual, Comparison to Baseline (Model) (Ratio (95% CI), p value) |
|----------------------------------------------------------|------------------------------------|-------------------------------------------------------------------------------|
| Usual                                                    | Palliative                         |                                                                               |
| 0.9802 (0.6741, 1.4254),<br>0.9161                       | 0.6290 (0.3799, 1.0416),<br>0.0500 | 0.6418 (0.3635, 1.1330), 0.1228                                               |
| 1.0104 (0.7115, 1.4349),<br>0.9534                       | 0.8749 (0.5862, 1.3056),<br>0.5084 | 0.8658 (0.5330, 1.4065), 0.5649                                               |

**H. How many times have you seen or talked to a social worker, therapist, psychologist, or religious/spiritual counselor (outside of the study team)?**

|          | Sample (N, Mean (SD)) |                     | Model (Mean Estimate (95% CI)) |            |
|----------|-----------------------|---------------------|--------------------------------|------------|
|          | Usual                 | Palliative          | Usual                          | Palliative |
| Baseline | 96, 0.8542 (2.3663)   | 99, 1.0707 (3.3994) | 0.9387 (0.6119, 1.4399)        |            |

|           |                     |                     |                         |                         |
|-----------|---------------------|---------------------|-------------------------|-------------------------|
| 6 Months  | 90, 0.7556 (2.2451) | 93, 0.5269 (2.0726) | 0.8087 (0.4733, 1.3818) | 0.5076 (0.2346, 1.0985) |
| 12 Months | 82, 0.6098 (1.4295) | 93, 0.5054 (1.3563) | 0.6044 (0.3689, 0.9901) | 0.5187 (0.3035, 0.8863) |

| Comparison to Baseline (Model) (Ratio (95% CI), p value) |                                    | Palliative vs Usual, Comparison to Baseline (Model) (Ratio-Ratio (95% CI), p value) |  |
|----------------------------------------------------------|------------------------------------|-------------------------------------------------------------------------------------|--|
| Usual                                                    | Palliative                         |                                                                                     |  |
| 0.8615 (0.5270, 1.4083),<br>0.5517                       | 0.5408 (0.2406, 1.2153),<br>0.1088 | 0.6277 (0.2557, 1.5410), 0.2869                                                     |  |
| 0.6438 (0.3603, 1.1505),<br>0.1468                       | 0.5526 (0.2713, 1.1254),<br>0.1195 | 0.8582 (0.4148, 1.7759), 0.5653                                                     |  |

**eTable 4.** Cumulative Models for Patients for 6 Months and 12 Months, Patients With Complete Data Only

**A. How many times have you gone to an emergency room about your own health?**

|           | Sample (N, Mean (SD)) |                     | Model (Mean Estimate (95% CI)) |                         | Palliative vs Usual (Model) (Ratio (95% CI), p value) |
|-----------|-----------------------|---------------------|--------------------------------|-------------------------|-------------------------------------------------------|
|           | Usual                 | Palliative          | Usual                          | Palliative              |                                                       |
| 6 Months  | 81, 0.3333 (0.7746)   | 81, 0.5679 (1.1173) | 0.3333 (0.2016, 0.5512)        | 0.5679 (0.3710, 0.8694) | 1.7037 (0.8815, 3.2930), 0.1209                       |
| 12 Months | 71, 0.8873 (1.5358)   | 65, 0.9385 (1.3906) | 0.8873 (0.5949, 1.3234)        | 0.9385 (0.6564, 1.3417) | 1.0576 (0.6187, 1.8081), 0.8374                       |

**B. How many times have you been a patient in a hospital overnight?**

|          | Sample (N, Mean (SD)) |                     | Model (Mean Estimate (95% CI)) |                         | Palliative vs Usual (Model) (Ratio (95% CI), p value) |
|----------|-----------------------|---------------------|--------------------------------|-------------------------|-------------------------------------------------------|
|          | Usual                 | Palliative          | Usual                          | Palliative              |                                                       |
| 6 Months | 81, 0.1605 (0.4862)   | 81, 0.1728 (0.7034) | 0.1605 (0.0833, 0.3092)        | 0.1728 (0.0716, 0.4170) | 1.0769 (0.3592, 3.2289), 0.8960                       |

|           |                        |                           |                            |                            |                                    |
|-----------|------------------------|---------------------------|----------------------------|----------------------------|------------------------------------|
| 12 Months | 71, 0.2817<br>(0.7208) | 65,<br>0.4308<br>(1.4892) | 0.2817 (0.1560,<br>0.5087) | 0.4308 (0.1871,<br>0.9918) | 1.5292 (0.5503, 4.2498),<br>0.4614 |
|-----------|------------------------|---------------------------|----------------------------|----------------------------|------------------------------------|

**C. How many times did a medically trained person come to patient's home to help [him/her]?**

|           | Sample (N, Mean (SD))       |                         | Model (Mean Estimate (95% CI)) |                             | Palliative vs Usual (Model) (Ratio (95% CI), p value) |
|-----------|-----------------------------|-------------------------|--------------------------------|-----------------------------|-------------------------------------------------------|
|           | Usual                       | Palliative              | Usual                          | Palliative                  |                                                       |
| 6 Months  | 80, 4.1375<br>(10.7806)     | 80, 4.6125<br>(12.9961) | 4.1375 (2.3460,<br>7.2971)     | 4.6125 (2.4973,<br>8.5192)  | 1.1148 (0.4834, 2.5712),<br>0.8002                    |
| 12 Months | 70,<br>12.4143<br>(30.4429) | 64, 6.7656<br>(19.5949) | 12.4143 (7.0182,<br>21.9594)   | 6.7656 (3.3463,<br>13.6789) | 0.5450 (0.2202, 1.3486),<br>0.1973                    |

**D. How many times have you seen or talked to a social worker, therapist, psychologist, or religious/spiritual counselor (outside of the study team)?**

|  | Sample (N, Mean (SD)) |            | Model (Mean Estimate (95% CI)) |            | Palliative vs Usual (Model) (Ratio (95% CI), p value) |
|--|-----------------------|------------|--------------------------------|------------|-------------------------------------------------------|
|  | Usual                 | Palliative | Usual                          | Palliative |                                                       |
|  |                       |            |                                |            |                                                       |



|           |                         |                        |                            |                            |                                    |
|-----------|-------------------------|------------------------|----------------------------|----------------------------|------------------------------------|
| 6 Months  | 78, 2.0000<br>(5.6866)  | 81, 1.5309<br>(3.1507) | 2.0000 (1.0685,<br>3.7437) | 1.5309 (0.9806,<br>2.3899) | 0.7654 (0.3547, 1.6516),<br>0.5200 |
| 12 Months | 66, 4.2273<br>(12.1653) | 63, 2.5397<br>(5.8443) | 4.2273 (2.1224,<br>8.4196) | 2.5397 (1.4453,<br>4.4627) | 0.6008 (0.2467, 1.4633),<br>0.3101 |

## eReferences

1. Kluger BM, Katz M, Galifianakis N, et al. Does outpatient palliative care improve patient-centered outcomes in Parkinson's disease: Rationale, design, and implementation of a pragmatic comparative effectiveness trial. *Contemp Clin Trials*. 2019;79:28-36.
2. Kluger BM, Persenaire MJ, Holden SK, et al. Implementation issues relevant to outpatient neurology palliative care. *Ann Palliat Med*. 2018;7(3):339-348.
3. Clark D. 'Total pain', disciplinary power and the body in the work of Cicely Saunders, 1958-1967. *Soc Sci Med*. 1999;49(6):727-736.
