# Supplementary material for: Comparison of Integrated Outpatient Palliative Care With Standard Care in Patients With Parkinson Disease and Related Disorders: A Randomized Clinical Trial
Source: PubMed Central journal article supplement (PMC7042842; doi:10.1001/jamaneurol.2019.4992), 2020-02-10
Supplement: jamaneurol-77-551-s003.pdf [file jamaneurol-77-551-s003.pdf]

## Data Sharing Statement

Kluger. Comparison of Integrated Outpatient Palliative Care With Standard Care in Patients With Parkinson Disease and Related Disorders. *JAMA Neurol*. Published February 10, 2020. 10.1001/jamaneurol.2019.4992

### Data

**Data available:** Yes

**Data types:** Deidentified participant data, Data dictionary

#### How to access

**data:** <https://palliativecareresearch.org/corescenters/data-informatics-statistics-core-disc/pcrc-de-identified-data-repository-didr>

**When available:** With publication

### Supporting Documents

**Document types:** Statistical/analytic code

#### How to access

**documents:** <https://palliativecareresearch.org/corescenters/data-informatics-statistics-core-disc/pcrc-de-identified-data-repository-didr>

**When available:** With publication

### Additional Information

**Who can access the data:** researchers whose proposed use of the data has been approved

**Types of analyses:** for any purpose

**Mechanisms of data availability:** after approval or proposal
